# Supplementary material
Source: PubMed Central journal article supplement (PMC3269771)
Supplement: supp_92.2.197_Deng.pdf [file supp_92.2.197_Deng.pdf]

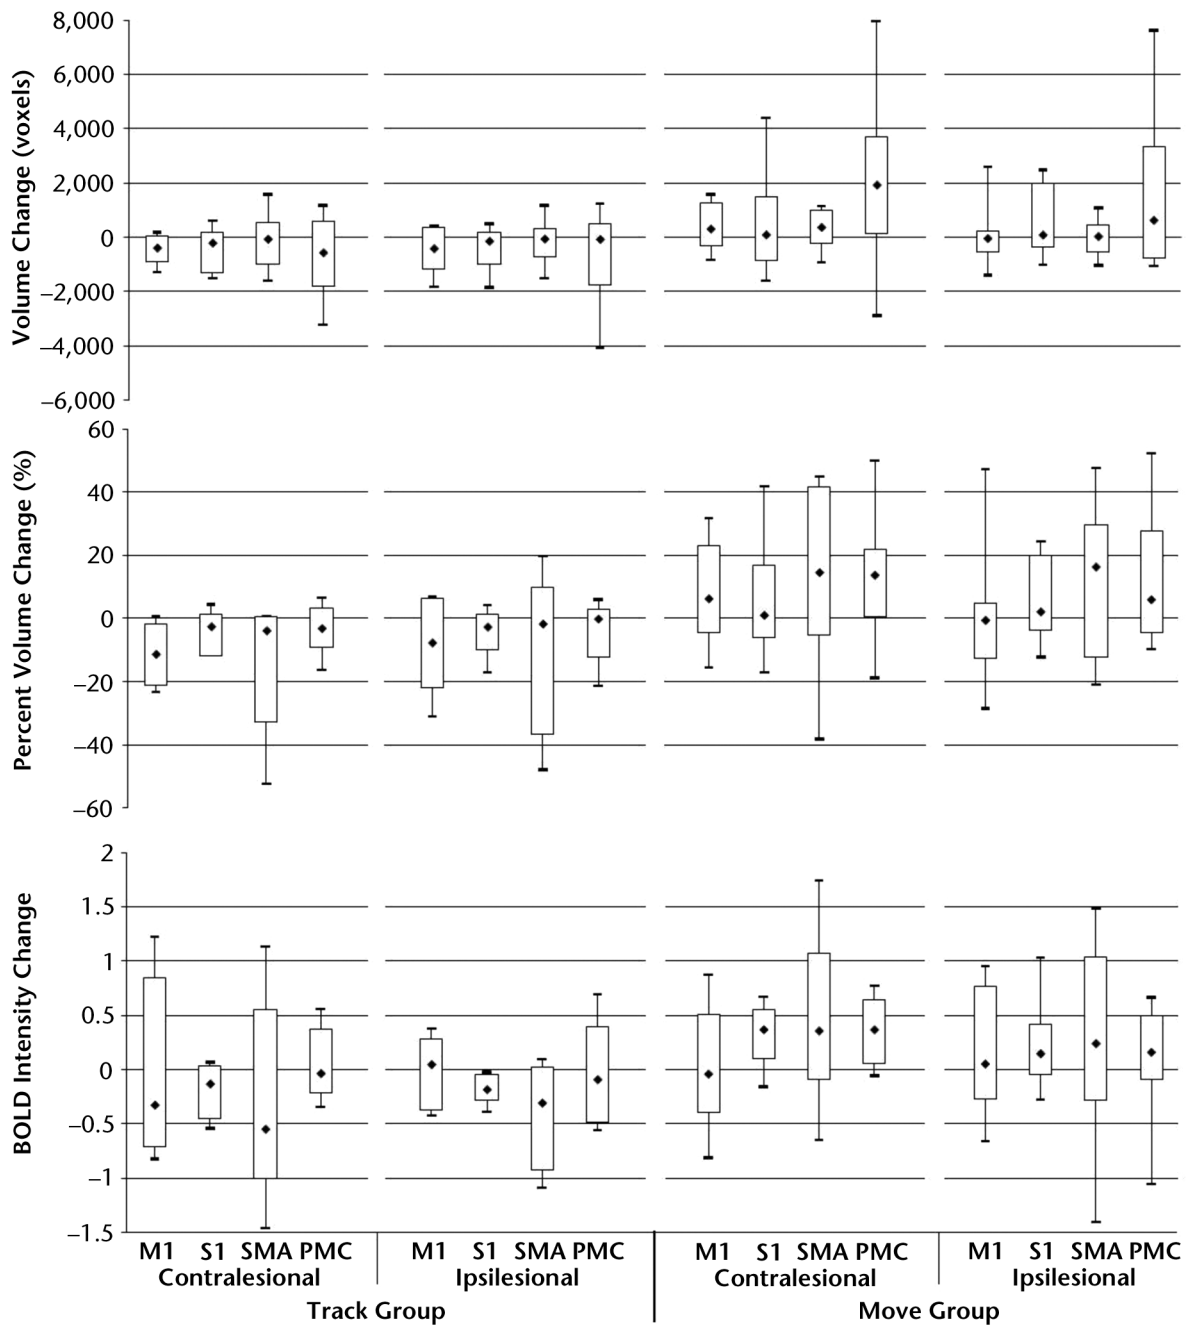

**eFigure 1.**

Median change (first quartile, third quartile, minimum, maximum) values from pretest to posttest of volume, percent volume, and blood oxygen level–dependent (BOLD) intensity of activation of the ipsilesional and contralateral primary motor area (M1), primary somatosensory area (S1), premotor cortex (PMC), and supplementary motor area (SMA).

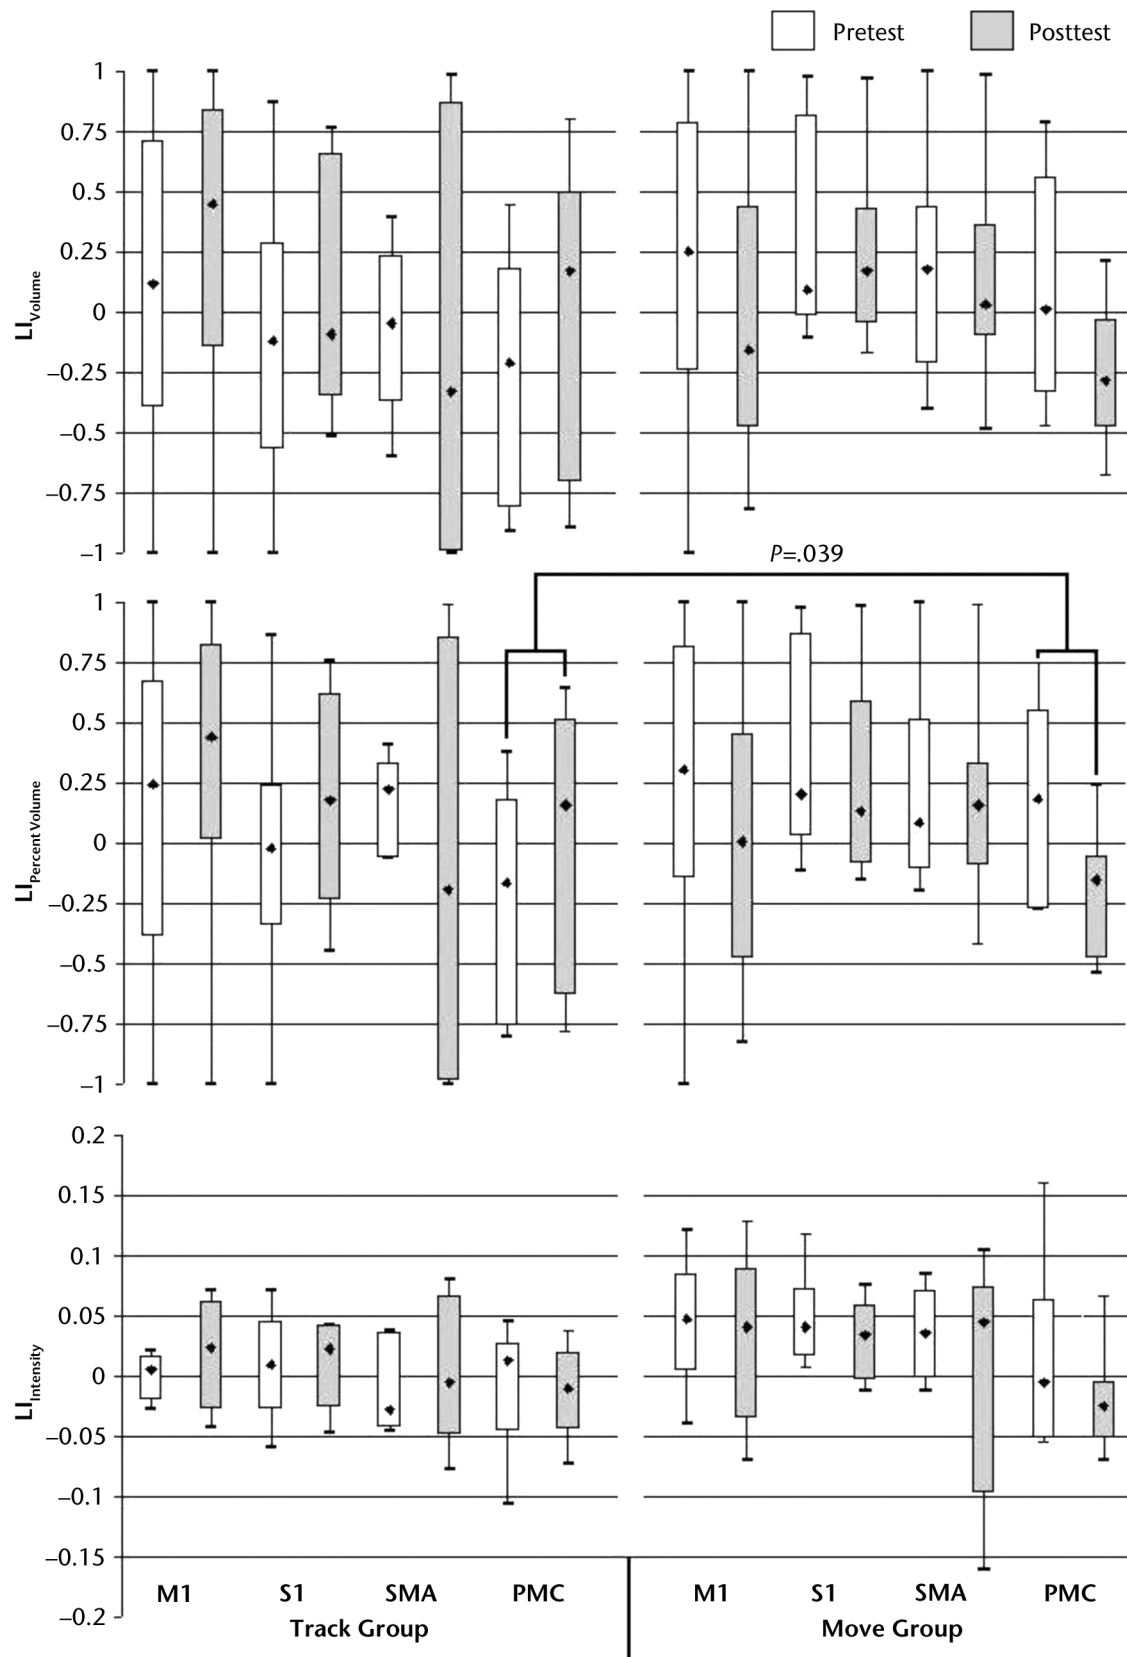

**eFigure 2.**

Median (first quartile, third quartile, minimum, maximum) values of laterality index (LI) of volume, percent volume, and intensity for primary motor area (M1), primary somatosensory area (S1), premotor cortex (PMC), and supplementary motor area (SMA).
